# Supplementary material
Source: publisher figshare collection journal article supplement (https://acs.figshare.com/ndownloader/files/4673470)
Supplement: Supplementary file 1 [file 4673470]

# CdSe Nanorods Functionalized with Thiol-anchored Oligothiophenes

*Bryan C. Sih and Michael O. Wolf\**

Department of Chemistry, University of British Columbia, Vancouver, BC, Canada,

V6T 1Z1

## Supporting Information

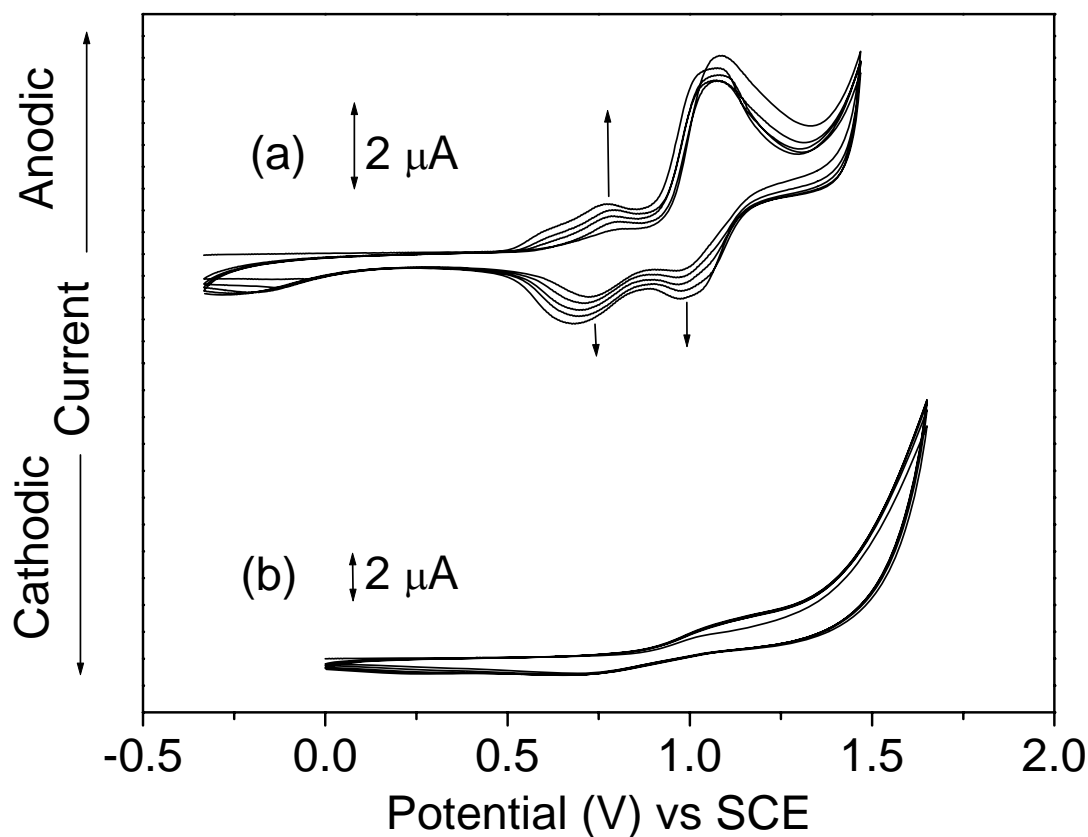

**Figure S1.** Cyclic voltammetry of (a) **3** and (b) **3-CdSe** (5 cycles) from 0 to 1.3 V in  $\text{CH}_2\text{Cl}_2$  containing 0.1 M  $(\text{C}_4\text{H}_9)\text{NPF}_6$ . The arrows indicate the direction of current change with each successive scan.

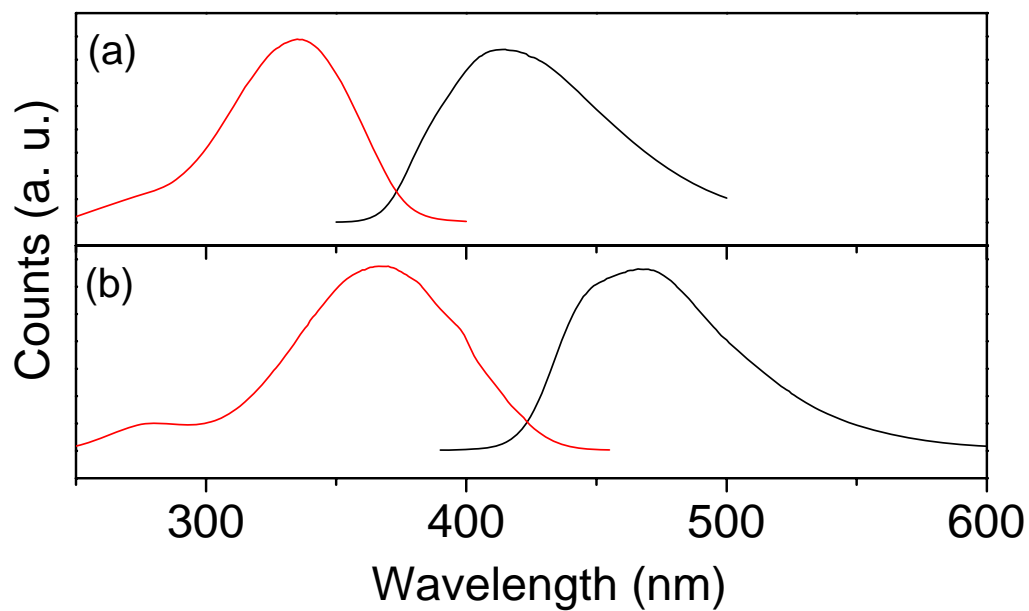

**Figure S2.** Excitation (—) and emission (—) spectra of the capping groups (a) **2** and (b) **3** in  $\text{CHCl}_3$  excited at 326 and 363 nm, respectively.

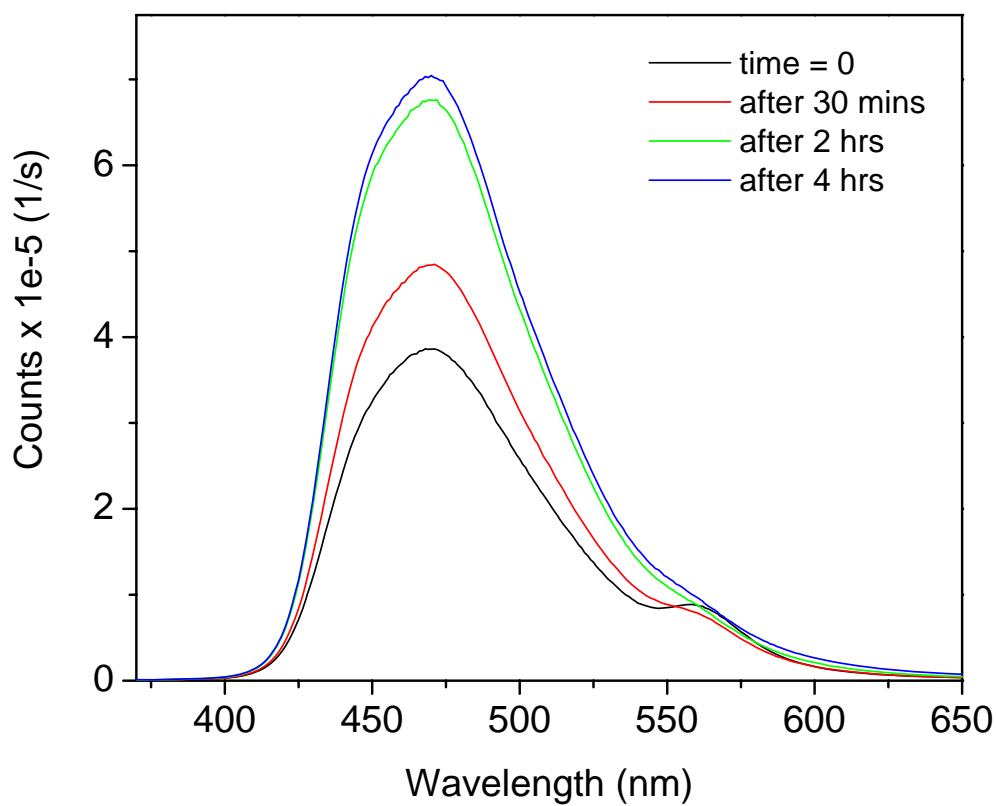

**Figure S3.** Emission spectra of **3-CdSe** as a function of time.

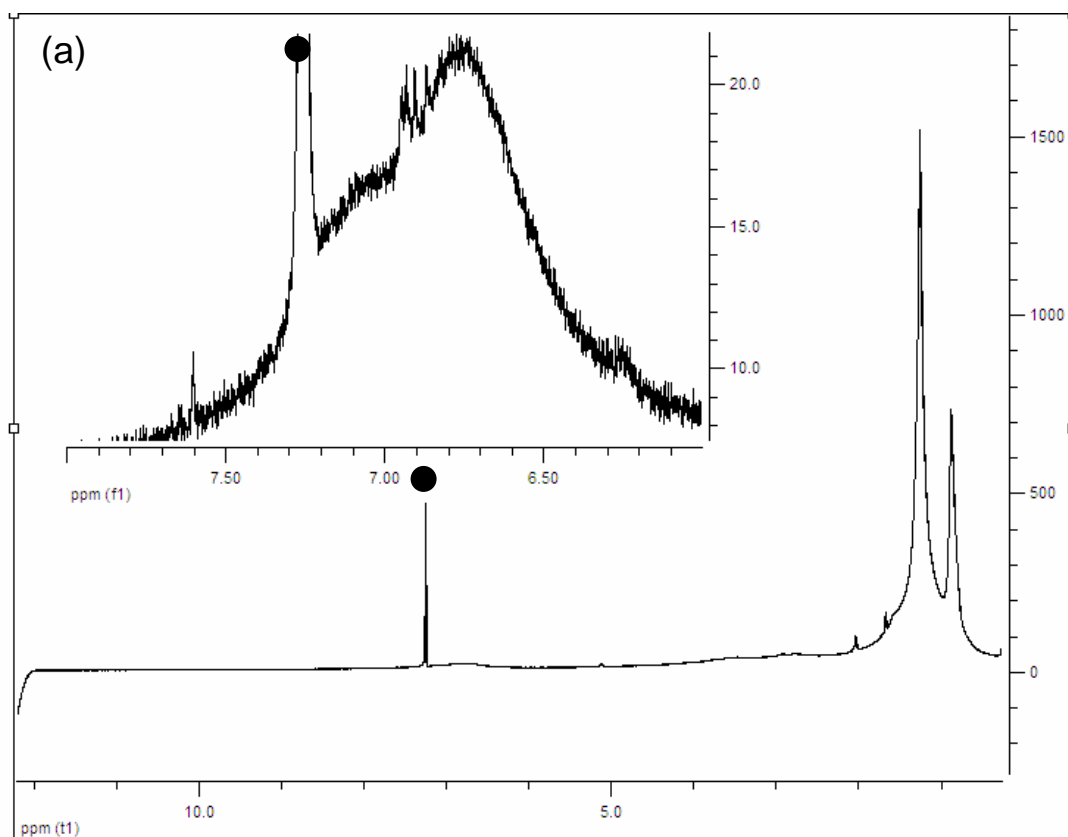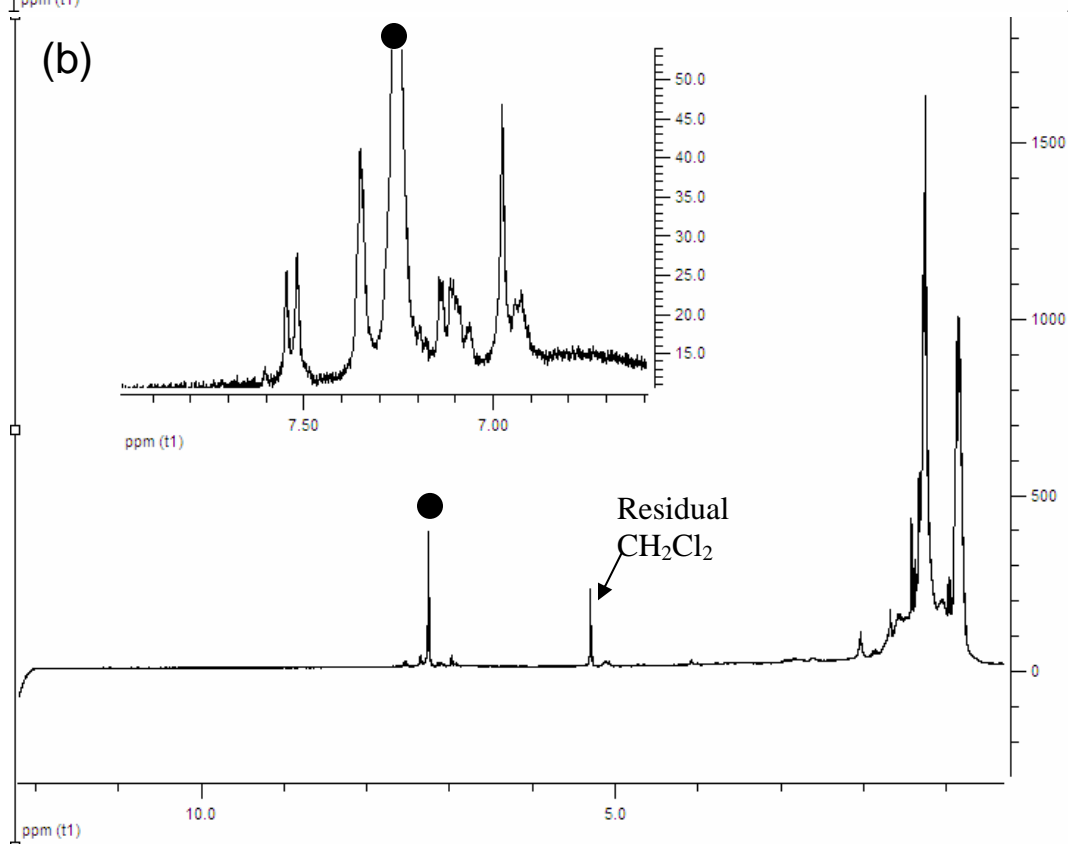

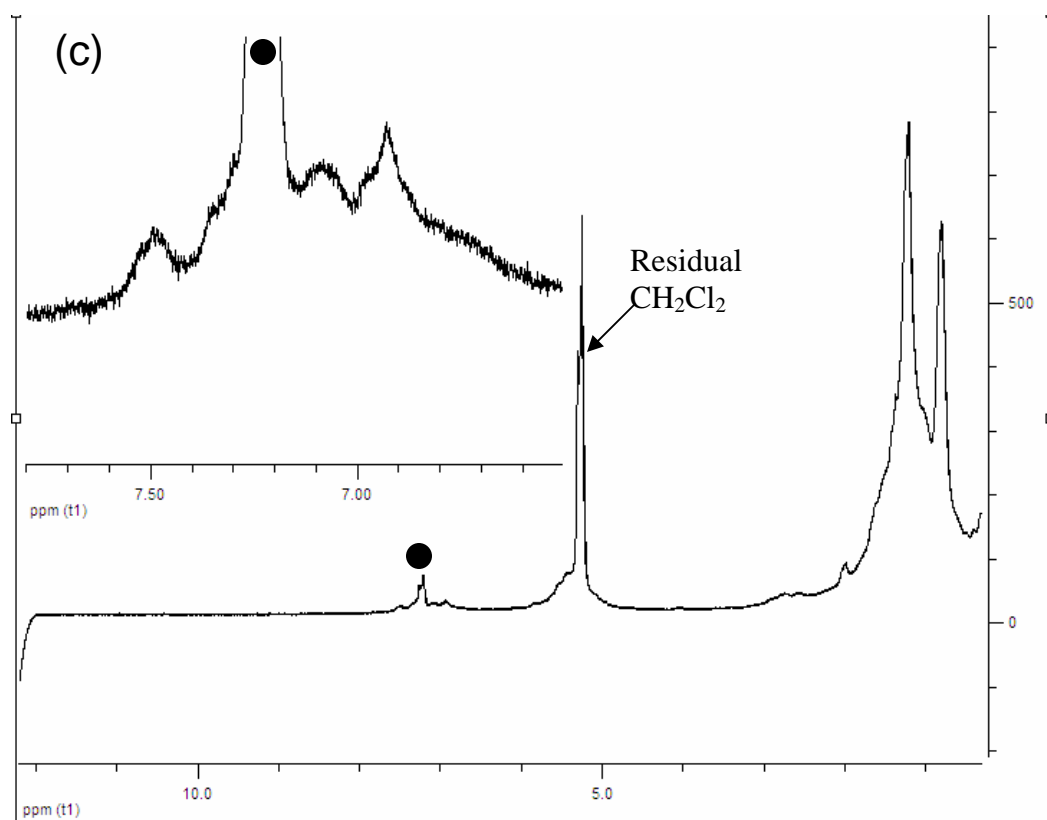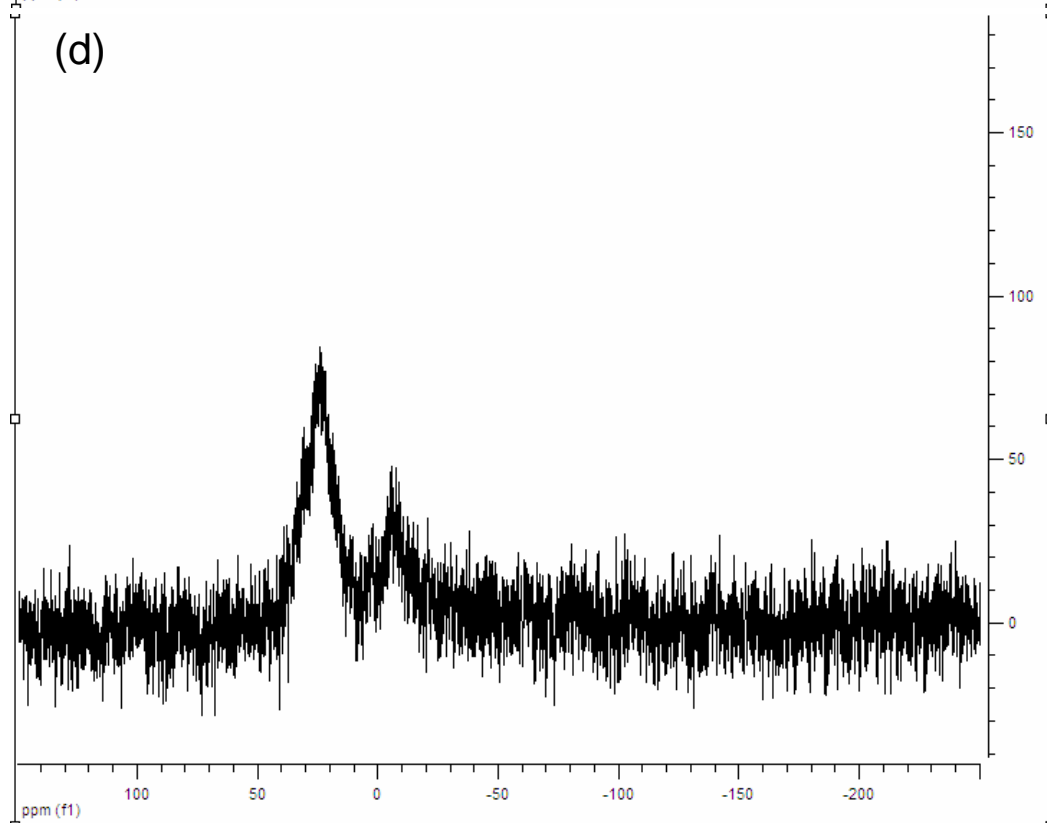

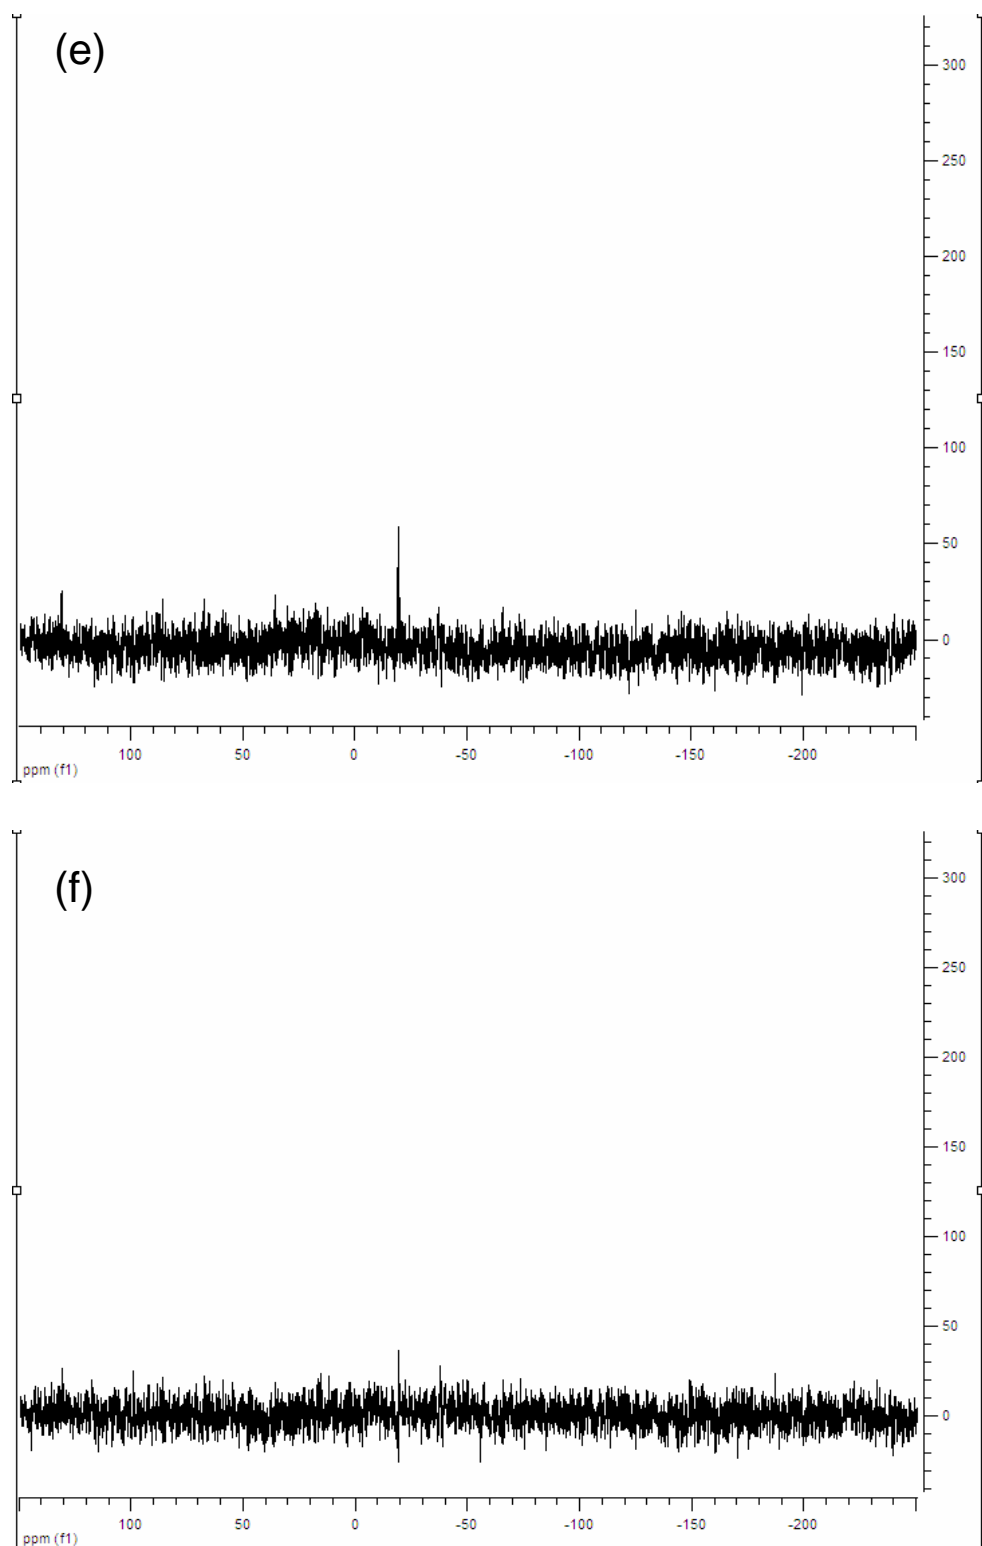

**Figure S4.**  $^1\text{H}$  NMR spectra of (a) **1-CdSe**, (b) **2-CdSe** and (c) **3-CdSe** dissolved in  $\text{CDCl}_3$  (300 MHz). Insets: expansion of the oligothiophene region. The (•) indicates the proton signal of residual  $\text{CHCl}_3$  present in the solvent.  $^{31}\text{P}$  NMR spectra of (d) **1-CdSe**, (e) **2-CdSe** and (f) **3-CdSe** dissolved in  $\text{CDCl}_3$  (300 MHz).

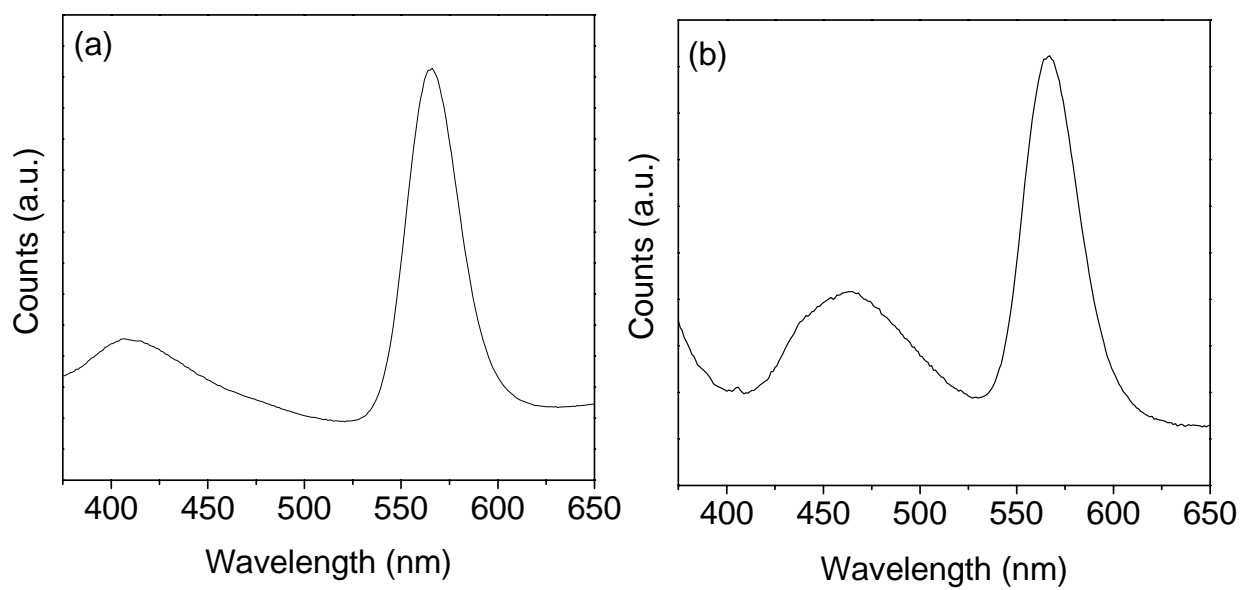

**Figure S5.** Solid-state emission spectra of (a) **2-CdSe** and (b) **3-CdSe**.
